# Supplementary material for: Low temperature and rapid formation of high quality metal oxide thin film via a hydroxide-assisted energy conservation strategy
Source: Royal Society of Chemistry journal article supplement (doi:10.1039/c8tc03544j), 2018-01-01
Supplement: c8tc03544j2.pdf [file c8tc03544j2.pdf]

## Supplementary Information for

### Low Temperature and Rapid Formation of High Quality Metal Oxide Thin Film via Hydroxide-Assisted Energy Conservation Strategy

*Meng-Huan Jao, Chien-Chen Cheng, Chun-Fu Lu, Kai-Chi Hsiao, and Wei-Fang Su\**

Department of Materials Science and Engineering, National Taiwan University, Taipei 10617, Taiwan

E-mail: [suwf@ntu.edu.tw](mailto:suwf@ntu.edu.tw)

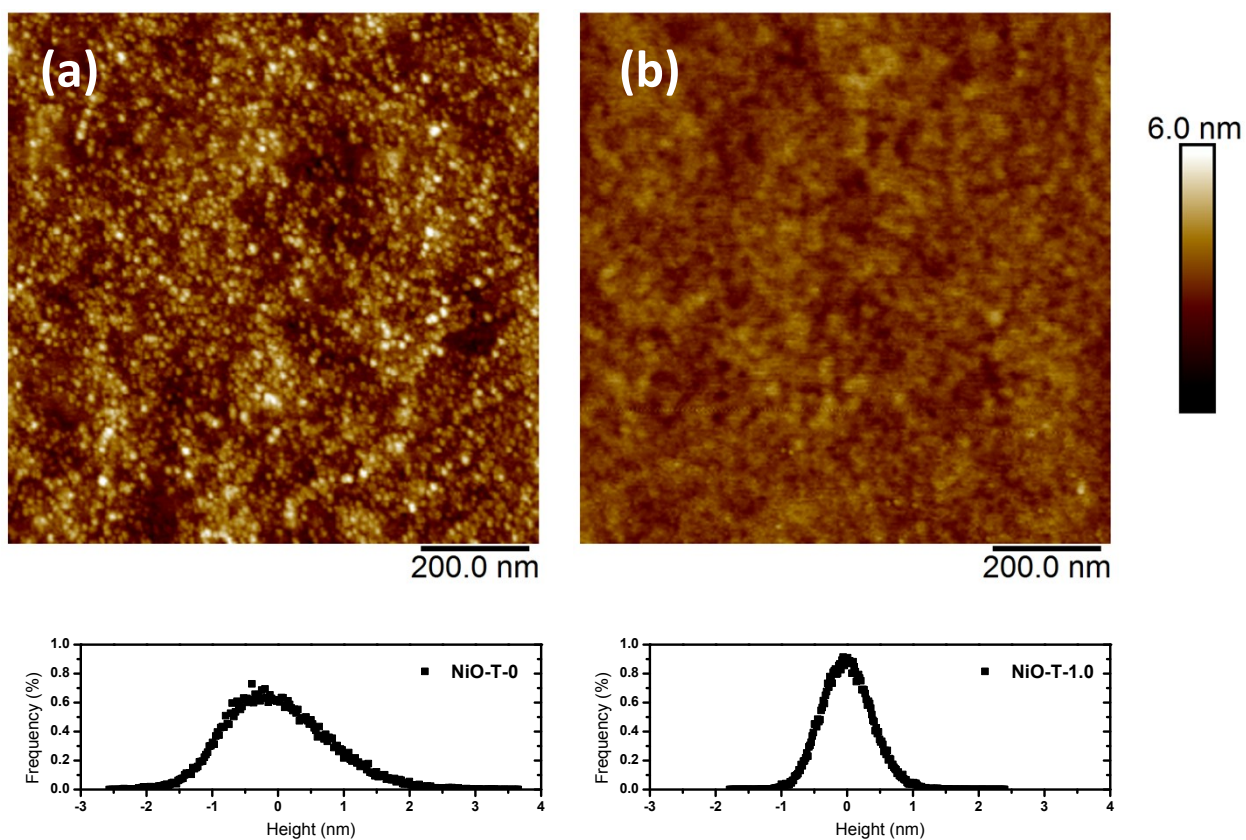

**Figure S1.** Atomic force microscope images of (a) NiO-T-0, and (b) NiO-T-1.0 thin films. Bottom part shows the histogram of height in each image.

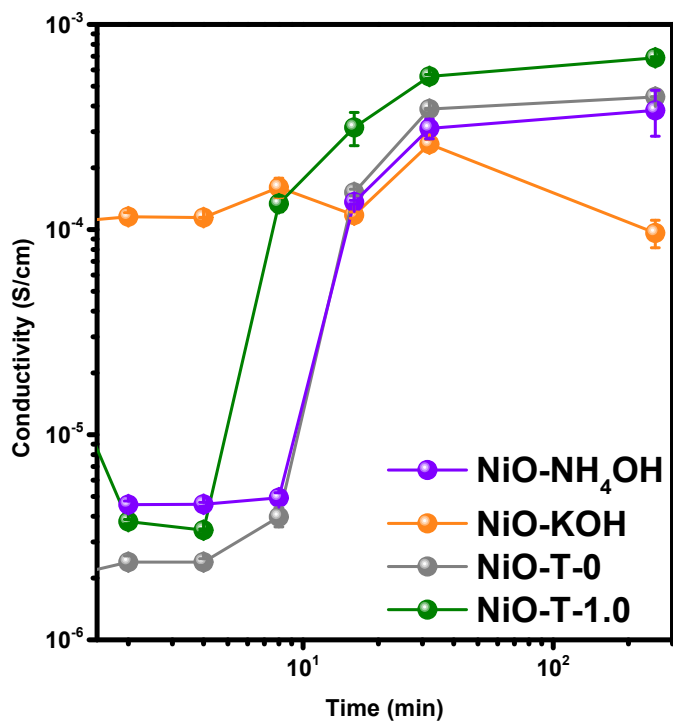

**Figure S2.** Conductivity evolution of nickel oxide film prepared by sol-gel process with  $\text{NH}_4\text{OH}$  or  $\text{KOH}$ . The annealing temperature was set at  $250^\circ\text{C}$ .

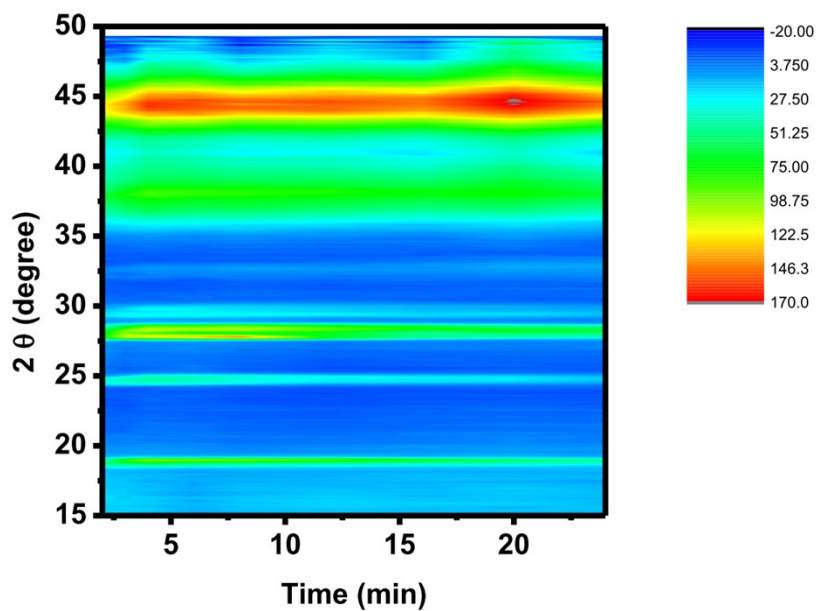

**Figure S3.** In-situ GIWAXS of nickel oxide thin film prepared by sol-gel process with  $\text{KOH}$ .

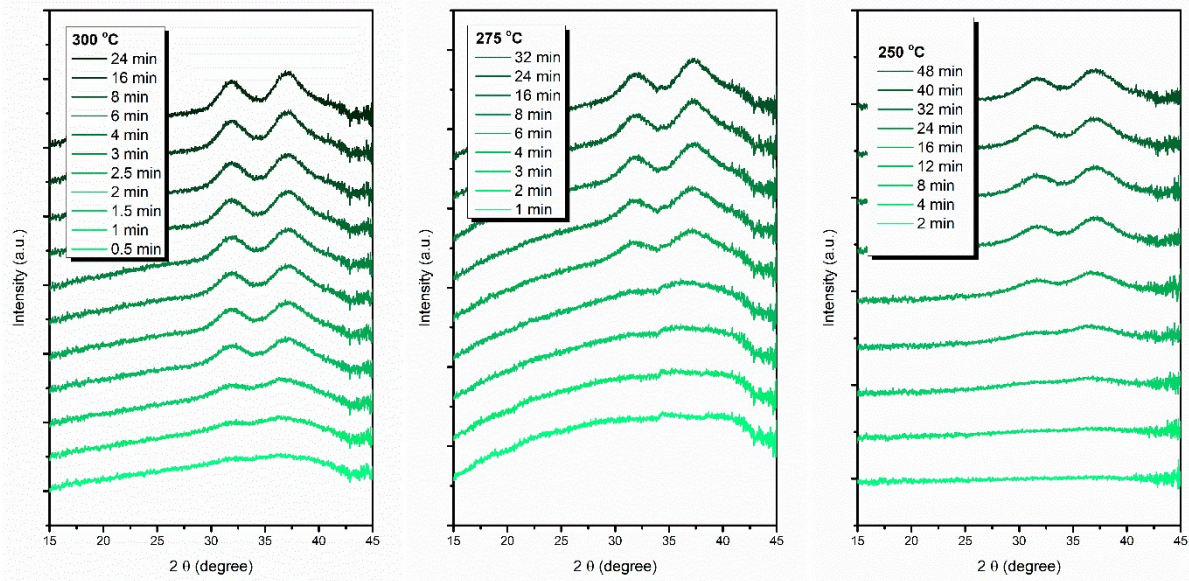

**Figure S4.** Time evolution of X-Ray diffraction pattern for NiO-T-0 thin film annealed at different temperature.

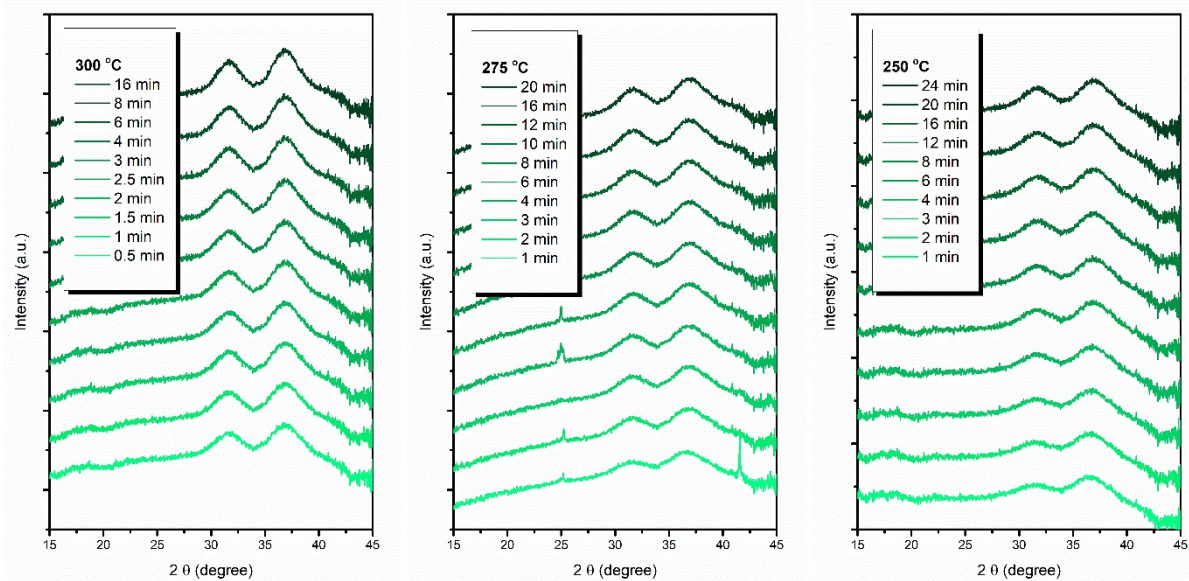

**Figure S5.** Time evolution of X-Ray diffraction pattern for NiO-T-1.0 thin film annealed at different temperature.



With some arrangement, we can derive the following equation from Johnson-Mehl-Avrami (JMA) equation:

$$\ln[-\ln(1-x)] = n \ln t + n \ln k$$

which we used to calculate reaction rate constant k.

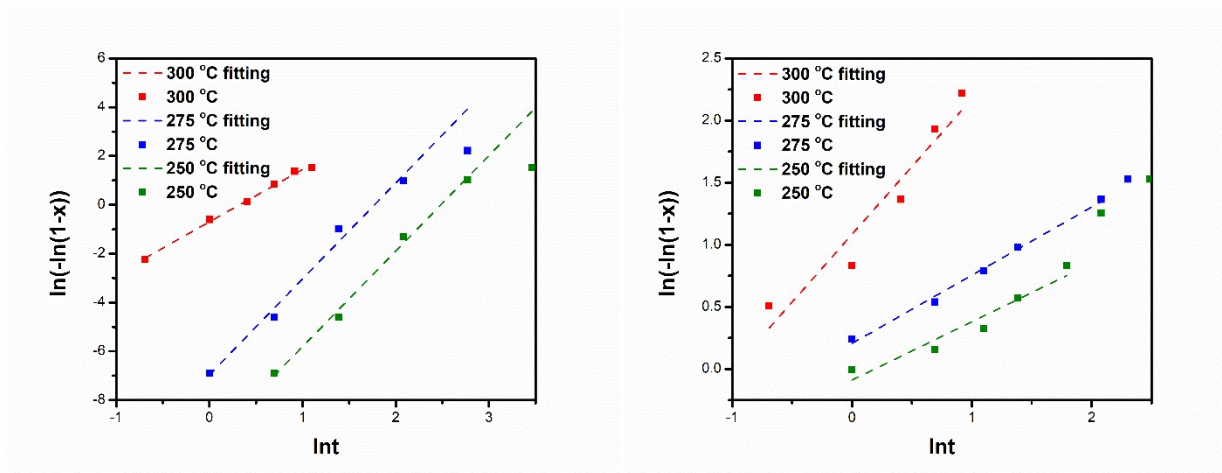

**Figure S6.**  $\ln(-\ln(1-x))$  versus  $\ln t$  plot for calculation of reaction rate constant k. The left one is data reduction from NiO-T-0, the right one is data reduction from NiO-T-1.0.

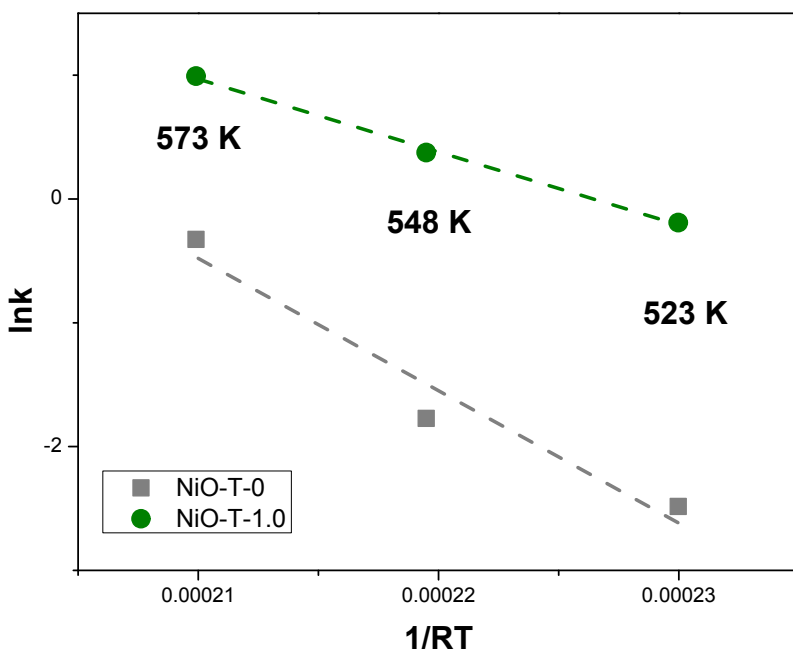

**Figure S7.** Plot based on Arrhenius equation to calculate activation energy. The slopes of lines were found to be -107k and -59k for NiO-T-0 and NiO-T-1.0, respectively.

**Table S1.** XPS peak analysis of O 1s from In<sub>2</sub>O<sub>3</sub> thin films.

| XPS Signal      | 300 °C w/o | 300 °C w/ | 250 °C w/o | 250 °C w/ |
|-----------------|------------|-----------|------------|-----------|
| Lattice O       | 8450       | 8426      | 6080       | 6521      |
| Vacancy O       | 3538       | 3578      | 4777       | 4431      |
| Lattice/Vacancy | 2.38       | 2.35      | 1.27       | 1.47      |

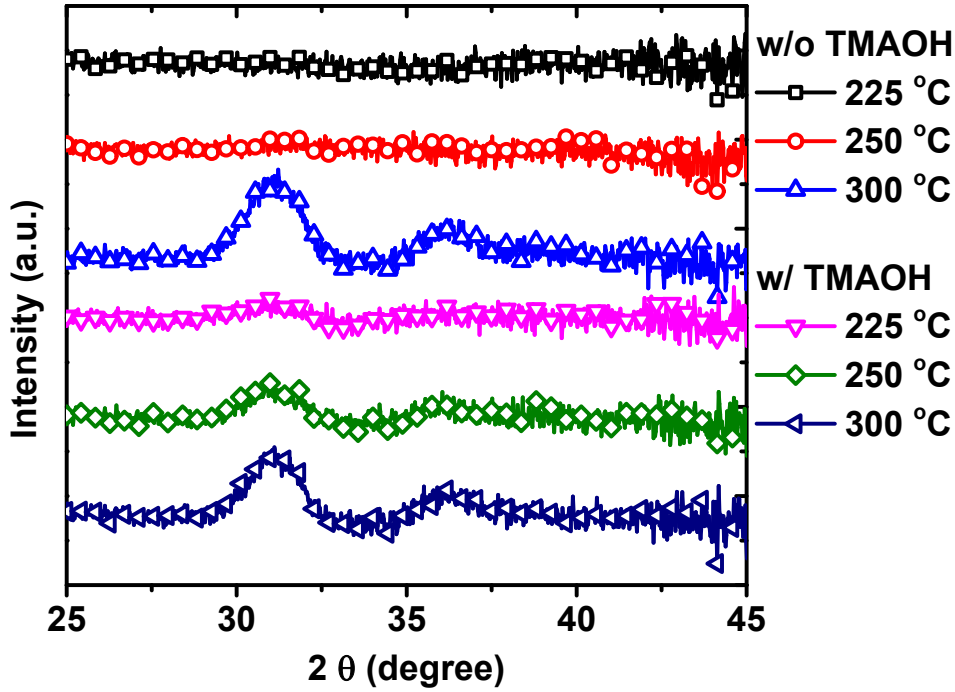

**Figure S8.** GIWAXS results of sol-gel In<sub>2</sub>O<sub>3</sub> films by sol-gel process w/o or w/ TMAOH. The annealing temperatures were varied from 225 to 300 °C.

**Table S2.** Performance of OIHP photovoltaics based on NiO thin films, which were annealed at 300 °C for designed time span.

| NiO w/o TMAOH     |                     |                                       |              |              |
|-------------------|---------------------|---------------------------------------|--------------|--------------|
| Anneal Time (min) | V <sub>oc</sub> (V) | J <sub>sc</sub> (mA/cm <sup>2</sup> ) | FF (%)       | PCE (%)      |
| 2                 | 0.64 ± 0.04         | 0.01 ± 0.00                           | 27.26 ± 1.32 | 0.00 ± 0.00  |
| 4                 | 1.02 ± 0.00         | 18.25 ± 0.22                          | 68.56 ± 3.24 | 12.87 ± 0.45 |
| 8                 | 1.02 ± 0.00         | 17.57 ± 0.43                          | 77.73 ± 0.85 | 13.99 ± 0.46 |
| 30                | 1.02 ± 0.00         | 18.86 ± 0.36                          | 76.96 ± 1.11 | 14.79 ± 0.33 |
| NiO w/ TMAOH      |                     |                                       |              |              |
| Anneal Time (min) | V <sub>oc</sub> (V) | J <sub>sc</sub> (mA/cm <sup>2</sup> ) | FF (%)       | PCE (%)      |
| 2                 | 1.00 ± 0.01         | 17.58 ± 0.38                          | 70.76 ± 2.55 | 12.49 ± 0.36 |
| 4                 | 1.02 ± 0.00         | 18.81 ± 0.31                          | 72.89 ± 0.88 | 13.99 ± 0.32 |
| 8                 | 1.01 ± 0.00         | 18.67 ± 0.33                          | 75.61 ± 1.37 | 14.37 ± 0.24 |
| 30                | 1.02 ± 0.01         | 19.30 ± 0.54                          | 77.15 ± 1.13 | 15.24 ± 0.67 |

**Table S3.** Performance of OIHP photovoltaics based on NiO thin films, which were annealed at different temperature for 15 min.

| NiO w/o TMAOH    |                     |                                       |              |              |
|------------------|---------------------|---------------------------------------|--------------|--------------|
| Anneal Temp (°C) | V <sub>oc</sub> (V) | J <sub>sc</sub> (mA/cm <sup>2</sup> ) | FF (%)       | PCE (%)      |
| 300              | 1.02 ± 0.00         | 18.36 ± 0.30                          | 76.73 ± 0.54 | 14.48 ± 0.21 |
| 275              | 1.01 ± 0.01         | 18.79 ± 0.52                          | 73.33 ± 1.60 | 13.98 ± 0.40 |
| 250              | 1.02 ± 0.00         | 18.69 ± 0.29                          | 72.62 ± 1.60 | 13.87 ± 0.30 |
| 225              | 1.00 ± 0.02         | 0.39 ± 0.33                           | 21.29 ± 0.57 | 0.08 ± 0.07  |
| 200              | 0.43 ± 0.05         | 0.00 ± 0.00                           | 25.18 ± 2.05 | 0.00 ± 0.00  |
| NiO w/ TMAOH     |                     |                                       |              |              |
| Anneal Temp (°C) | V <sub>oc</sub> (V) | J <sub>sc</sub> (mA/cm <sup>2</sup> ) | FF (%)       | PCE (%)      |
| 300              | 1.01 ± 0.01         | 19.34 ± 0.28                          | 75.11 ± 1.09 | 14.73 ± 0.44 |
| 275              | 1.01 ± 0.01         | 19.28 ± 0.31                          | 75.39 ± 1.46 | 14.53 ± 0.43 |
| 250              | 1.02 ± 0.00         | 18.99 ± 0.41                          | 71.03 ± 2.32 | 14.07 ± 0.47 |
| 225              | 1.02 ± 0.01         | 16.67 ± 0.88                          | 71.19 ± 1.41 | 12.13 ± 0.59 |
| 200              | 1.01 ± 0.00         | 15.59 ± 0.59                          | 66.25 ± 2.16 | 10.43 ± 0.49 |
